# Supplementary material for: Machine learning constructs a diagnostic prediction model for gangrenous perforation of acute appendicitis in elderly patients
Source: Research Square preprint supplement (doi:10.21203/rs.3.rs-7656285/v1), 2025-10-29
Supplement: Supplementary file 1 [file ba2386fd7c57394a2d2c8e49.docx]

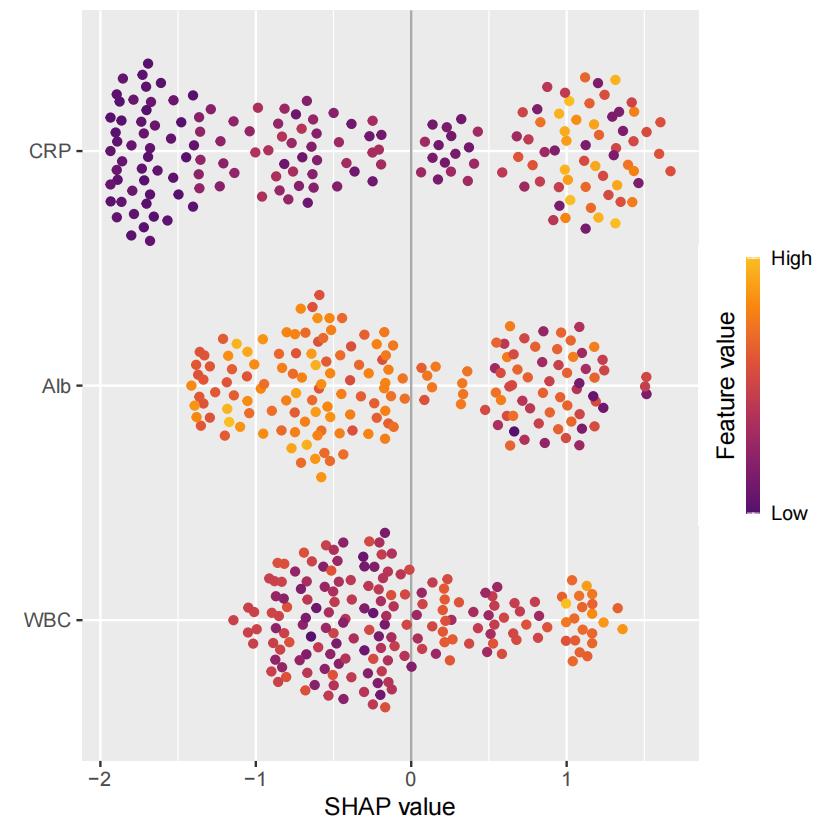


**Figure.** SHAP Summary Plot of the Training Set.


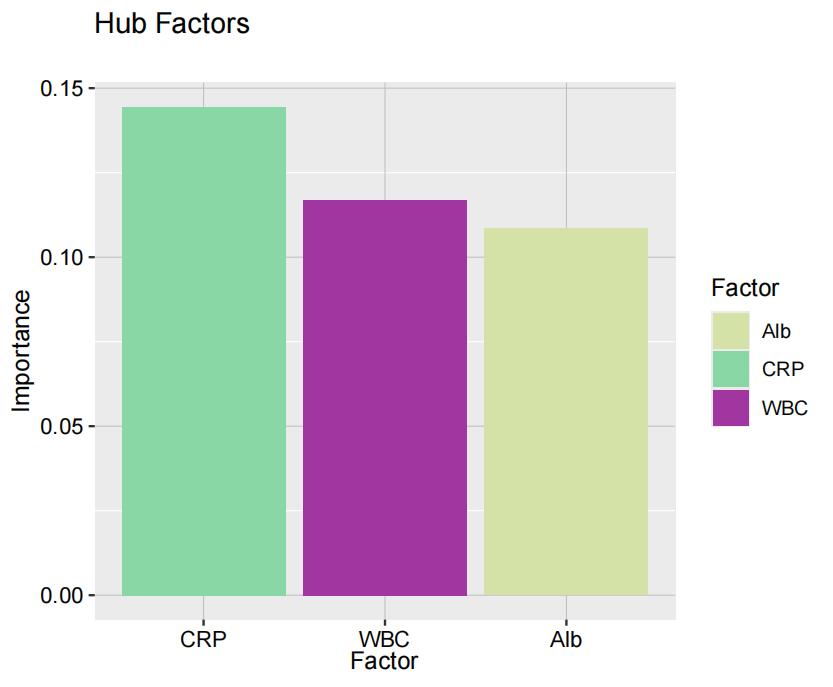


**Figure.** Feature Importance Ranking of the SVM Model.


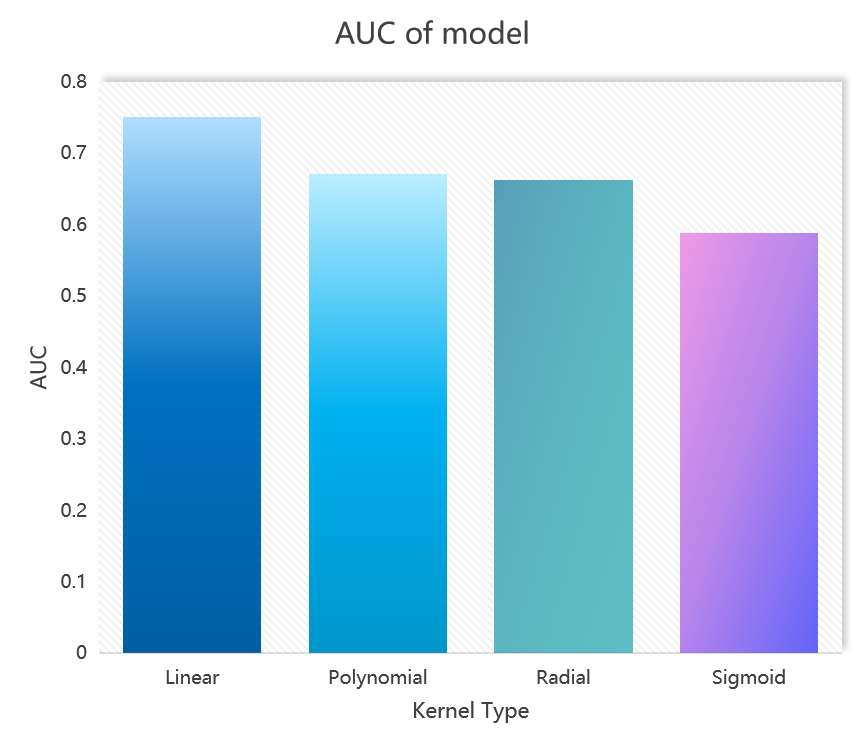


**Figure.** AUCs of Four SVM Kernel Functions.
